# Supplementary material
Source: PubMed Central journal article supplement (PMC7264428)
Supplement: mmc1.pdf [file mmc1.pdf]

YMTHE, Volume 28

## **Supplemental Information**

### **Integrative Analysis of NSCLC Identifies LINC01234 as an Oncogenic lncRNA that Interacts with HNRNPA2B1 and Regulates miR-106b Biogenesis**

**Zhenyao Chen, Xin Chen, Tianyao Lei, Yu Gu, Jinyao Gu, Jiali Huang, Binbin Lu, Li Yuan, Ming Sun, and Zhaoxia Wang**

**Figure S1**

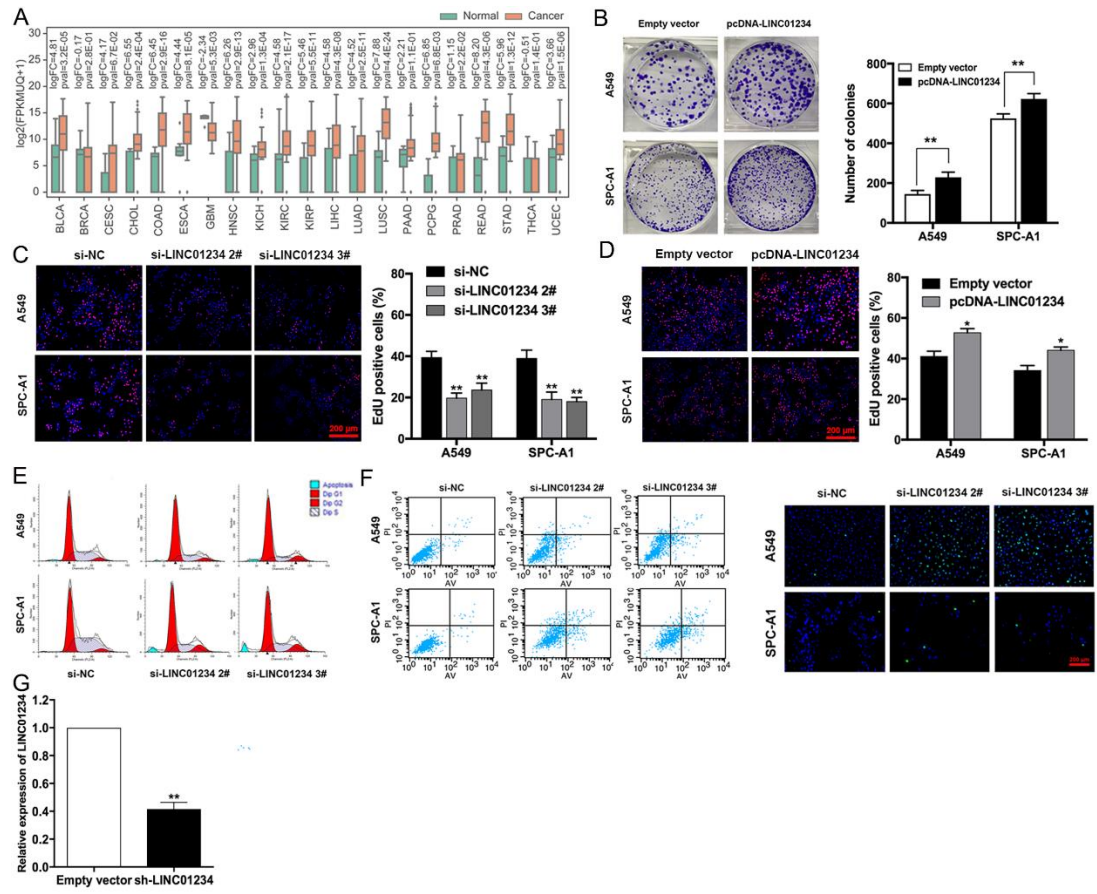

**Figure S2**

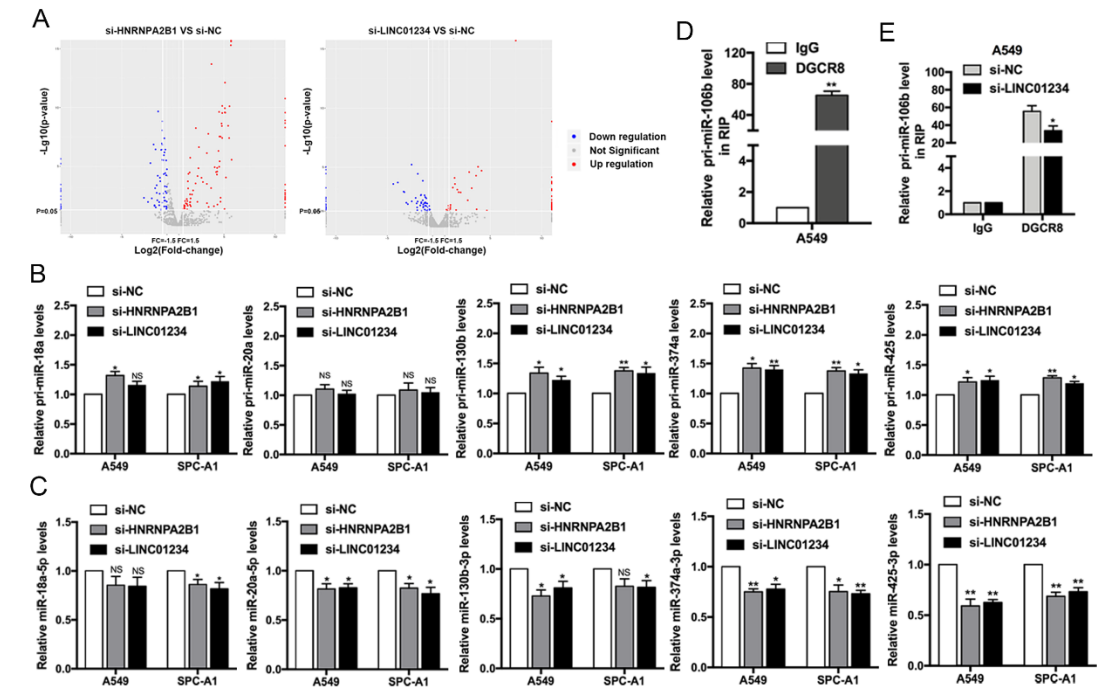

**Figure S3**

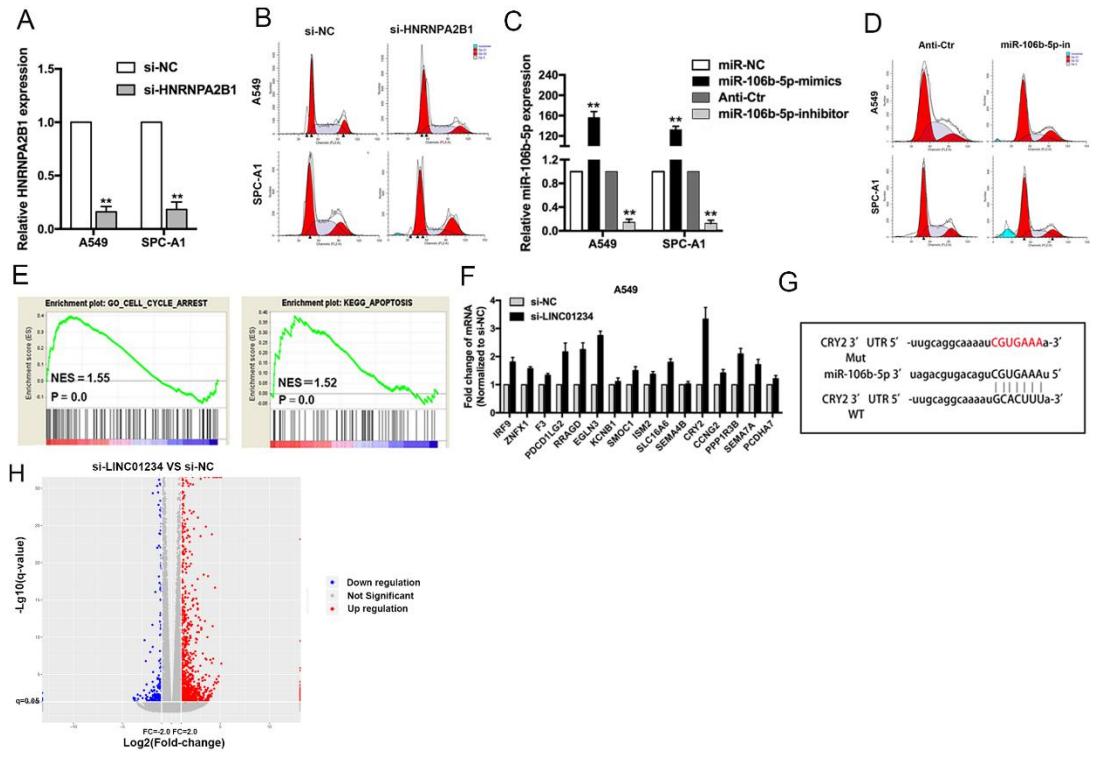

**Figure S4**

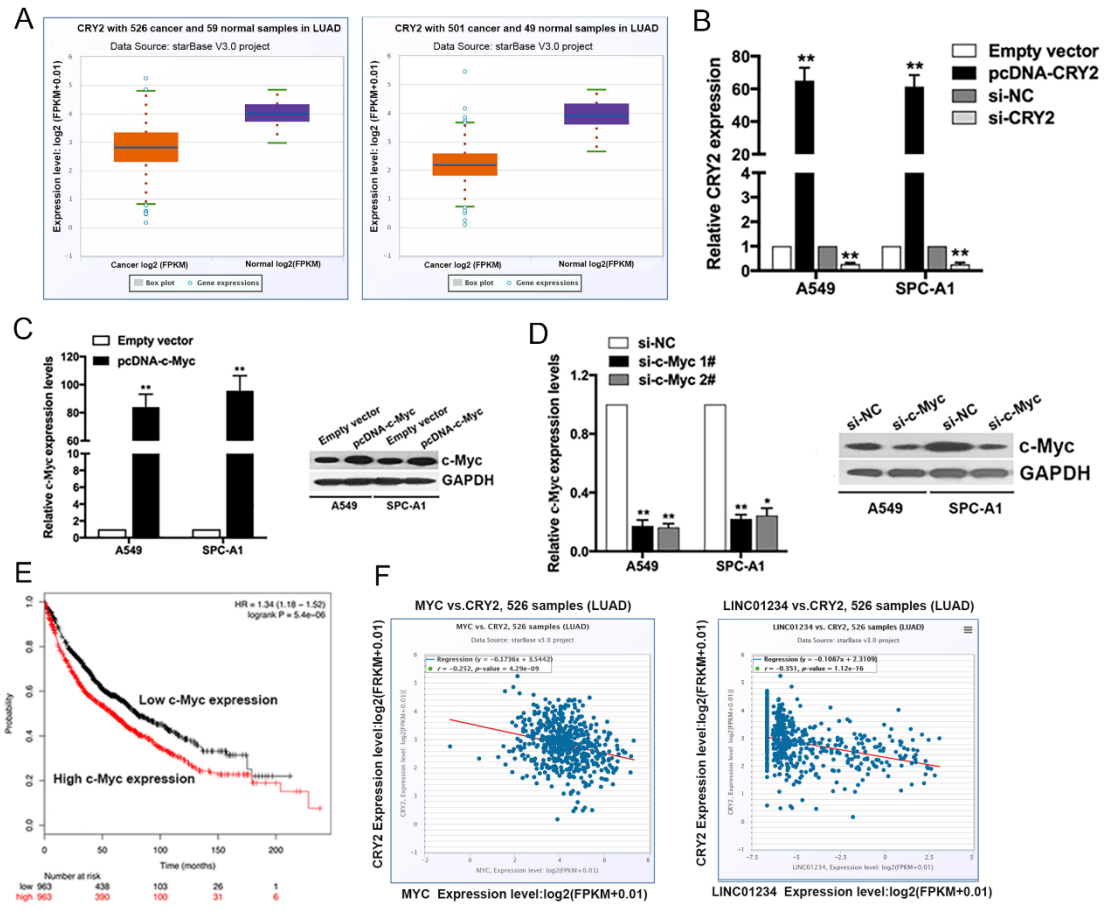

## Supplemental Figure Legends

**Figure S1.** Relative LINC01234 expression levels in human cancers and NSCLC cells. (A) LINC01234 expression levels in various cancers (bladder urothelial carcinoma [BLCA], breast invasive carcinoma [BRCA], cervical squamous cell carcinoma and endocervical adenocarcinoma [CESC], cholangiocarcinoma [CHOL], colon adenocarcinoma [COAD], esophageal carcinoma [ESCA], glioblastoma multiforme [GBM], head and neck squamous cell carcinoma [HNSC], kidney chromophobe [KICH], kidney renal clear cell carcinoma [KIRC], kidney renal papillary cell carcinoma [KIRP], hepatocellular carcinoma [LIHC], lung adenocarcinoma [LUAD], lung squamous cell carcinoma [LUSC], pancreatic adenocarcinoma [PAAD], pheochromocytoma and paraganglioma [PCPG], prostate adenocarcinoma [PRAD], rectal adenocarcinoma [READ], stomach adenocarcinoma [STAD], thyroid carcinoma [THCA], and uterine corpus endometrioid carcinoma [UCEC]). (B) Colony formation assays were used to evaluate the colony formation capacity of LINC01234-overexpressing A549 and SPC-A1 cells. (C and D) EdU assays were used to evaluate the cells proliferation ability of A549 and SPC-A1 cells overexpressing or depleted of LINC01234. (E and F) Representative images of cell cycle progression, cell apoptosis evaluated by Flow Cytometry and TUNEL staining. (G) qRT-PCR analysis of relative expression of LINC01234 in xenograft tumors. \*P < 0.05, \*\*P < 0.01.

**Figure S2.** Pri-miRNA and miRNA expression in NSCLC cells. (A) Volcano plot illustrating the differentially expressed miRNAs in LINC01234 or HNRNPA2B1 depleted cells. (fold change > 1.5, P-value < 0.05). (B) Pri-miRNA expression levels upon LINC01234 and HNRNPA2B1 depletion as measured by qRT-PCR. (C) Quantification of the expression levels of miRNAs when LINC01234 and HNRNPA2B1 was depleted in NSCLC cells. (D) Immunoprecipitation of DGCR8 and qPCR analysis of associated pri-miR-106b. (E) Immunoprecipitation of DGCR8 and qPCR analysis of associated pri-miR-106b after transfection with LINC01234 siRNA. \*P < 0.05, \*\*P < 0.01.

**Figure S3.** HNRNPA2B1 and miR-106b-5p exert oncogenic function in NSCLC cells. (A) qRT-PCR analysis of HNRNPA2B1 mRNA levels after transfection with siRNA. (B) Flow cytometric cell cycle analysis of NSCLC cells transfected with HNRNPA2B1 siRNA. (C) Relative expression of miR-106b-5p in NSCLC cells transfected with miR-106b-5p mimics or inhibitors. (D) Cell cycle analysis of A549 and SPC-A1 cells transfected with control or miR-106b-5p inhibitors. (E) GSEA analysis showed the LINC01234 regulated genes enriched in cell cycle arrest and apoptosis

signature. (F) The altered mRNA levels of genes were confirmed by qRT-PCR in knockdown LINC01234. (G) Predicted binding sites for miR-106b-5p in CRY2 mRNA 3'UTR. (H) Volcano plot illustrating the differentially expressed genes in LINC01234 depleted cells. (fold change > 2.0, P-value < 0.05). \*P < 0.05, \*\*P < 0.01.

**Figure S4.** c-Myc is a downstream target of CRY2 and promotes LINC01234 transcription in NSCLC cells. (A) Expression levels of CRY2 in LUAD and LUSC from TCGA. (B) qRT-PCR analysis of CRY2 mRNA levels in A549 and SPC-A1 cells under overexpressing or depletion of CRY2. (C-D) qRT-PCR analysis of c-Myc mRNA levels and western blot analysis of c-Myc protein levels after knockdown or overexpression of c-Myc. (E) Kaplan–Meier survival analysis of the association between c-Myc expression level and NSCLC patient overall survival survival. (F) Negative correlation between the expression levels of c-Myc, LINC01234 and CRY2. \*P < 0.05, \*\*P < 0.01.

**Table S1.** Correlation between LINC01234 expression and clinicopathological characteristics of NSCLC patients (n = 95)

| Characteristics              | LINC01234         |                   | P                           |
|------------------------------|-------------------|-------------------|-----------------------------|
|                              | Low no. cases (%) | High no. case (%) | Chi-squared test<br>P-value |
| <b>Age (years)</b>           |                   |                   |                             |
| >65                          | 21                | 28                | 0.363                       |
| ≤65                          | 24                | 22                |                             |
| <b>Gender</b>                |                   |                   |                             |
| Male                         | 27                | 29                | 0.843                       |
| Female                       | 18                | 21                |                             |
| <b>Smoking history</b>       |                   |                   |                             |
| Smokers                      | 25                | 30                | 0.661                       |
| Never smokers                | 20                | 20                |                             |
| <b>Histological subtype</b>  |                   |                   |                             |
| Squamous cell carcinoma      | 22                | 18                | 0.204                       |
| Adenocarcinoma               | 23                | 32                |                             |
| <b>Histologic grade</b>      |                   |                   |                             |
| Well differentiated          | 20                | 18                | 0.668                       |
| Moderately differentiated    | 13                | 14                |                             |
| Poorly differentiated        | 10                | 13                |                             |
| Undifferentiated             | 2                 | 5                 |                             |
| <b>Tumor size</b>            |                   |                   |                             |
| ≤5cm                         | 36                | 27                | 0.007**                     |
| >5cm                         | 9                 | 23                |                             |
| <b>Lymph node metastasis</b> |                   |                   |                             |
| Negative                     | 31                | 20                | 0.005**                     |
| Positive                     | 14                | 30                |                             |
| <b>T-Status</b>              |                   |                   |                             |
| T1                           | 13                | 8                 | 0.059                       |
| T2                           | 23                | 19                |                             |
| T3                           | 7                 | 18                |                             |
| T4                           | 2                 | 5                 |                             |
| <b>N-Status</b>              |                   |                   |                             |
| N0                           | 31                | 20                | 0.019*                      |
| N1                           | 10                | 22                |                             |
| N2                           | 4                 | 8                 |                             |
| <b>TNM Stage</b>             |                   |                   |                             |
| I                            | 18                | 6                 | 0.003**                     |
| II                           | 17                | 20                |                             |
| III                          | 10                | 24                |                             |

\*P<0.05 was considered significant

**Table S2.** Univariate and multivariate analysis of clinicopathological factors for over-survival in NSCLC patients ((n = 95))

| Variables                                    | Univariate analysis |              |         | Multivariate analysis |             |         |
|----------------------------------------------|---------------------|--------------|---------|-----------------------|-------------|---------|
|                                              | HR                  | 95% CI       | p value | HR                    | 95% CI      | p value |
| Age<br>(≤65/>65)                             | 0.787               | 0.441-1.405  | 0.417   |                       |             |         |
| Gender<br>(Male/Female)                      | 1.457               | 0.815-2.606  | 0.204   |                       |             |         |
| Smoking history<br>(no vs yes)               | 1.550               | 0.873-2.751  | 0.135   |                       |             |         |
| Histological subtype<br>(LUAD /LUSC)         | 1.221               | 0.686-2.172  | 0.497   |                       |             |         |
| Histologic grade<br>(Well, mod / Poor, undi) | 2.400               | 1.731-3.328  | <0.001* | 1.983                 | 1.386-2.838 | <0.001* |
| Tumor size<br>(≤5/>5)                        | 2.308               | 1.294-4.115  | 0.005*  | 1.786                 | 0.889-3.586 | 0.103   |
| Lymphatic metastasis<br>(no vs yes)          | 7.364               | 3.286-16.502 | <0.001* | 3.195                 | 1.082-9.436 | 0.036*  |
| TNM stage<br>(III vs I+II)                   | 3.904               | 2.2-6.925    | <0.001* | 1.461                 | 0.661-3.227 | 0.348   |
| LINC01234 expression<br>(high vs low)        | 4.009               | 2.053-7.829  | <0.001* | 2.63                  | 1.272-5.435 | 0.009*  |

HR, hazard ratio; 95 % CI, 95 % confidence interval, \* Overall P < 0.05.
